# Supplementary material
Source: publisher site journal article supplement (https://www.dovepress.com/article/592972)
Supplement: Supplementary file 1 [file 592972_Supplementary%20Tables.pdf]

**Supplementary Table 1: Sequencing Quality Metrics and Coverage Summary**

| <b>Sample</b>                 | <b>Sample Type</b> | <b>Sequencing Method</b>      | <b>Average Depth (×)</b> | <b>Coverage ≥10× (%)</b> | <b>Coverage ≥20× (%)</b> | <b>Key Genetic Findings</b>                             |
|-------------------------------|--------------------|-------------------------------|--------------------------|--------------------------|--------------------------|---------------------------------------------------------|
| <b>Proband (Lesion FFPE)</b>  | FFPE tissue        | Whole-exome sequencing (WES)  | 333.85                   | 99.71                    | 99.58                    | No pathogenic variants in known nevus/fat-related genes |
| <b>Proband (Blood)</b>        | Peripheral blood   | WES                           | 149.63                   | 99.61                    | 99.03                    | Consistent with FFPE results                            |
| <b>Proband (Fresh tissue)</b> | Fresh tissue       | Whole-genome sequencing (WGS) | 55.13                    | 98.90                    | 98.26                    | No pathogenic SVs, CNVs, or mitochondrial variants      |
| <b>Father (Blood)</b>         | Peripheral blood   | WES                           | 146.72                   | 99.86                    | 99.61                    | Carrier of CYP2C19, PLEC, ABCA1, COL5A1 variants        |
| <b>Mother (Blood)</b>         | Peripheral blood   | WES                           | 134.66                   | 99.56                    | 98.73                    | Carrier of PRKCSH variant                               |

**Abbreviations:**

FFPE = formalin-fixed paraffin-embedded; SV = structural variant; CNV = copy number variation.

**Supplementary Table 2: Summary of Key Genetic Variants Detected in the Proband and Parents**

| Gene    | Chromosome (hg19) | Nucleotide Change | Protein Change | Zygosity in Proband | Parental Origin                         | ACMG Classification    | Associated Phenotypes (OMIM/ClinVar)                          | Potential Relevance to Current Phenotype                          |
|---------|-------------------|-------------------|----------------|---------------------|-----------------------------------------|------------------------|---------------------------------------------------------------|-------------------------------------------------------------------|
| CYP2C19 | chr2:219679132    | c.1214G>A         | p.Arg405Gln    | Heterozygous        | Paternal                                | Likely pathogenic      | Cerebrotendinous xanthomatosis (AR)                           | Lipid metabolism disorder; may involve skin/subcutaneous tissue   |
| UGT1A1  | chr2:234669144    | c.211G>A          | p.Gly71Arg     | Homozygous          | Both parents (Mother: het, Father: hom) | Likely pathogenic      | Gilbert syndrome (AR)                                         | Bilirubin metabolism; possible indirect link to skin pigmentation |
| PLEC    | chr8:145003337    | c.3194C>T         | p.Ser1065Leu   | Heterozygous        | Paternal                                | Uncertain significance | Epidermolysis bullosa simplex with muscular dystrophy (AR/AD) | Encodes plectin, involved in skin structural integrity            |
| PRKCSH  | chr19:11559797    | c.1355G>A         | p.Ser452Asn    | Heterozygous        | Maternal                                | Uncertain significance | Polycystic liver disease 1 (AD)                               | Cyst formation-related gene                                       |
| ABCA1   | chr9:107558399    | c.5317G>C         | p.Val1773Leu   | Heterozygous        | Paternal                                | Uncertain significance | Tangier disease (AR) / HDL deficiency                         | Lipid transporter; possible link to                               |

|        |                |             |                     |              |          |                        |                             |                                                |
|--------|----------------|-------------|---------------------|--------------|----------|------------------------|-----------------------------|------------------------------------------------|
|        |                |             |                     |              |          |                        | (AD)                        | fat metabolism                                 |
| COL5A1 | chr9:137708930 | c.4176+5A>G | Splice site variant | Heterozygous | Paternal | Uncertain significance | Ehlers-Danlos syndrome (AD) | Collagen gene; associated with skin elasticity |

**Abbreviations:**

AR = autosomal recessive; AD = autosomal dominant; het = heterozygous; hom = homozygous.

**Note:**

No pathogenic or likely pathogenic variants were identified in genes known to be associated with superficial lipomatous nevus or related dermatological conditions.

**Supplementary Table 3: Summary of Genetic Findings and Conclusions**

| <b>Category</b>                                 | <b>Finding</b>                                                                                                                                                    | <b>Interpretation</b>                                                                                       |
|-------------------------------------------------|-------------------------------------------------------------------------------------------------------------------------------------------------------------------|-------------------------------------------------------------------------------------------------------------|
| <b>Pathogenic Variants</b>                      | No pathogenic or likely pathogenic variants were identified in genes known to be associated with superficial lipomatous nevus or related dermatologic conditions. | The patient's phenotype is unlikely to be caused by a monogenic germline mutation in currently known genes. |
| <b>Variants of Uncertain Significance (VUS)</b> | VUS were detected in genes involved in lipid metabolism (CYP2C19, ABCA1), skin structure (PLEC, COL5A1), and liver function (PRKCSH, UGT1A1).                     | None are established causes of the reported phenotype; clinical relevance remains unclear.                  |
| <b>Structural/Copy Number Variants</b>          | Whole-genome sequencing revealed no pathogenic SVs, CNVs, or mitochondrial mutations.                                                                             | Large genomic rearrangements are not likely contributing to the disease.                                    |
| <b>Overall Genetic Conclusion</b>               | The genetic etiology of the patient's superficial lipomatous nevus remains undetermined.                                                                          | Suggests a possible non-Mendelian, mosaic, epigenetic, or yet-undiscovered genetic mechanism.               |
